# Supplementary material for: ERG induces a mesenchymal-like state associated with chemoresistance in leukemia cells
Source: PubMed Central journal article supplement (PMC3964212; doi:10.18632/oncotarget.1449), 2013-12-04

# ERG induces a mesenchymal-like state associated with chemoresistance in leukemia cells - Mochmann et al

A. ERG over-expressed genes in Grasso Prostate ERG Rearrange-ment

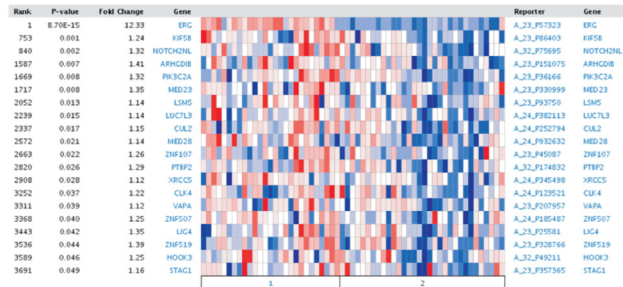

Legend: 1. ERG Rearrangement (27) 2. No ERG Rearrangement (32)

C. ERG over-expressed genes in Stickeler Breast Clinical Specimen

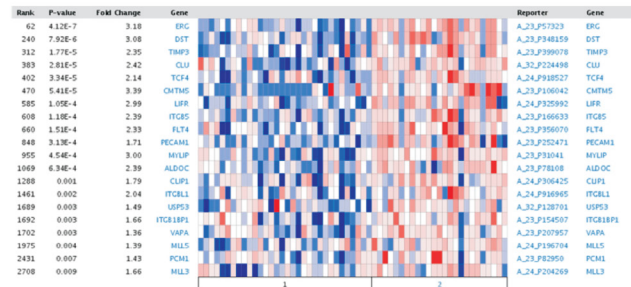

Legend: 1. No Treatment Control (32) 2. Epirubicin/Cyclophosphamide + Docetaxel Treatment (25)

B. ERG over-expressed genes in Grasso Prostate Carcinoma

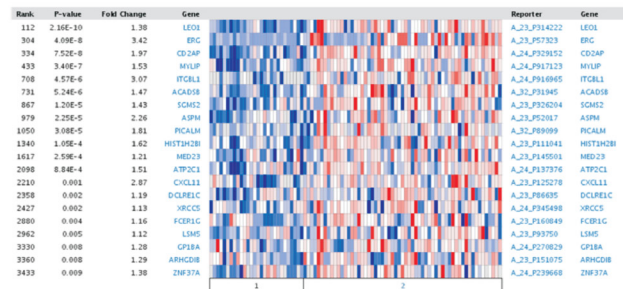

Legend: 1. Prostate Gland (28) 2. Prostate Carcinoma (59)

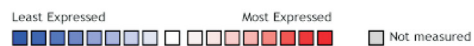

Supplement: oncotarget-05-351-s001.pdf [file oncotarget-05-351-s001.pdf]
