# Supplementary material for: ERG induces a mesenchymal-like state associated with chemoresistance in leukemia cells
Source: PubMed Central journal article supplement (PMC3964212; doi:10.18632/oncotarget.1449), 2013-12-04
Supplement: oncotarget-05-351-s002.pdf [file oncotarget-05-351-s002.pdf]

## ERG induces a mesenchymal-like state associated with chemoresistance in leukemia cells - Mochmann et al

Supplement Table 1. Source and significance of *ERG* induced genes mined with other cancer datasets. OncoPrint™ (Compendia Bioscience, Ann Arbor, MI) was used for analysis and visualization.

| Dataset          | Source         | Disease         | Comparison                                                            | P-Value  | Fold change |
|------------------|----------------|-----------------|-----------------------------------------------------------------------|----------|-------------|
| Grasso Prostate  | Nature 2012    | Prostate cancer | ERG rearrangement versus no rearrangement                             | 8.70E-15 | 12.3        |
| Grasso Prostate  | Nature 2012    | Prostate cancer | Prostate carcinoma versus prostate gland                              | 8.71E-08 | 3.4         |
| Stickeler Breast | Oncol Rep 2011 | Breast cancer   | Epirubicin/Cyclophosphamide + Docetaxel Treatment versus no treatment | 4.10E-07 | 3.18        |
